# Supplementary material for: Mechanistic insights into the role of alkali metal activation in CO 2 adsorption by nitrogen-doped coal-based carbon materials
Source: Royal Society of Chemistry journal article supplement (doi:10.1039/d5ra06428g), 2025-01-01
Supplement: d5ra06428g1.pdf [file d5ra06428g1.pdf]

# **Mechanistic insights into the role of alkali metal activation in CO<sub>2</sub> adsorption by nitrogen-doped coal-based carbon materials**

Zeru Gong <sup>ab</sup>, Liang Xie <sup>c</sup>, Wanjing Li<sup>c</sup>, Huijun Situ <sup>c</sup>, Pu Liu <sup>c</sup>, Wei Zhou <sup>c</sup>, Xiaoxiao Meng <sup>c\*</sup>

[a] Institute of Thermal Engineering, Tsinghua University, Beijing 100084, People's Republic of China

[b] CHN Energy Guangdong Power Co., Ltd, Guangzhou 510510, People's Republic of China

[c] School of Energy Science and Engineering, Harbin Institute of Technology, Harbin 150001, People's Republic of China

\*Corresponding author: A/Prof. Xiaoxiao Meng (mengxiaoxiao@hit.edu.cn)

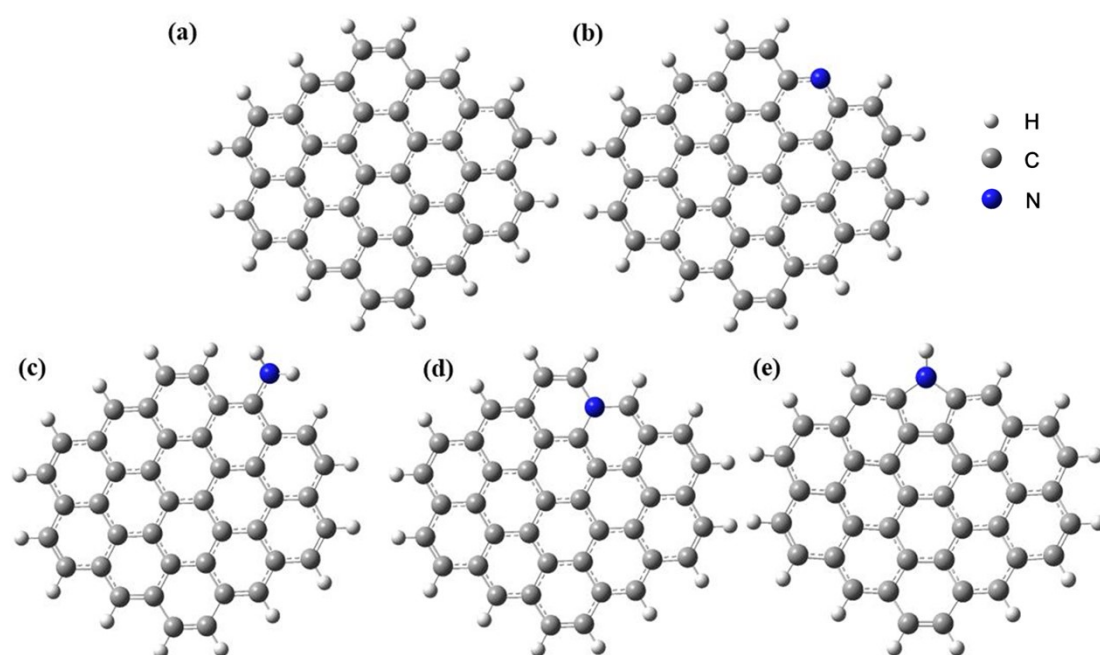

**Figure S1** Nitrogen-doped carbon model (a) undoped carbon model; (b) Pyridine nitrogen-doped carbon model; (c) Amine-doped carbon model; (d) Graphite nitrogen-doped carbon model; (e) Pyrrole nitrogen-doped carbon model.

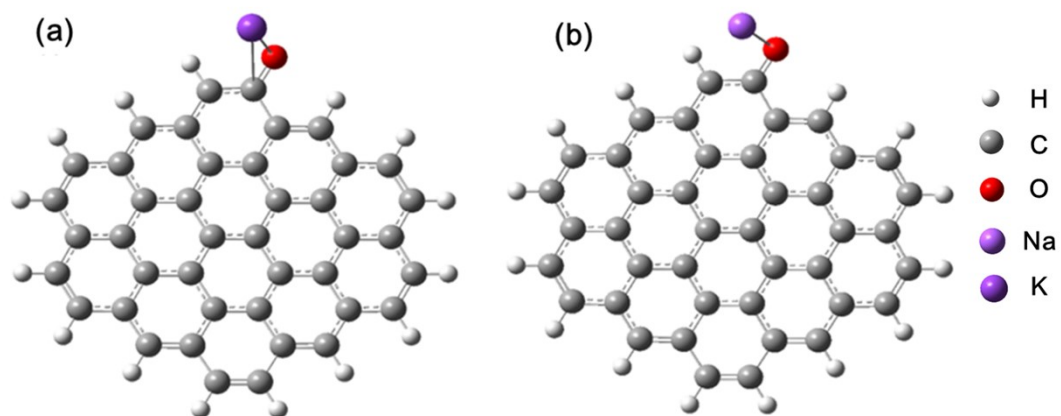

**Figure S2** (a) K-doped activated carbon model; (b) Na-doped carbon model.

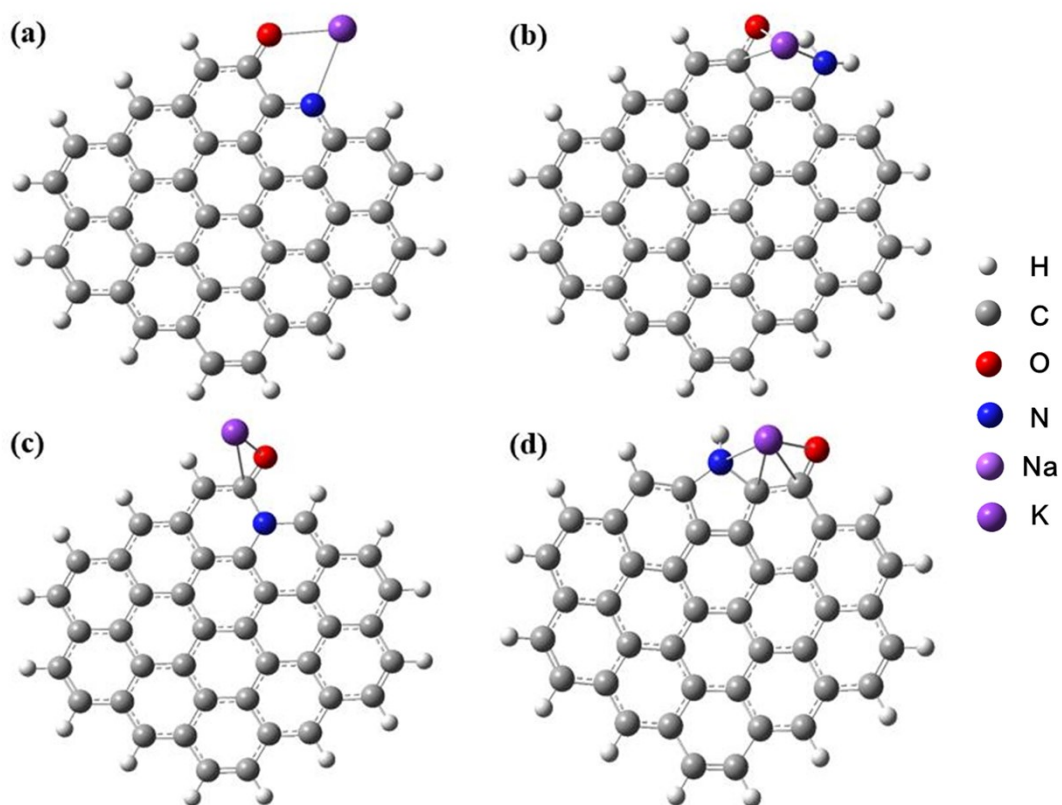

**Figure S3** Various types of co-doped carbon models of N and alkali metals (K, Na). (a)

Pyridine nitrogen; (b) Amino group; (c) Graphite nitrogen; (d) Pyrrole nitrogen.

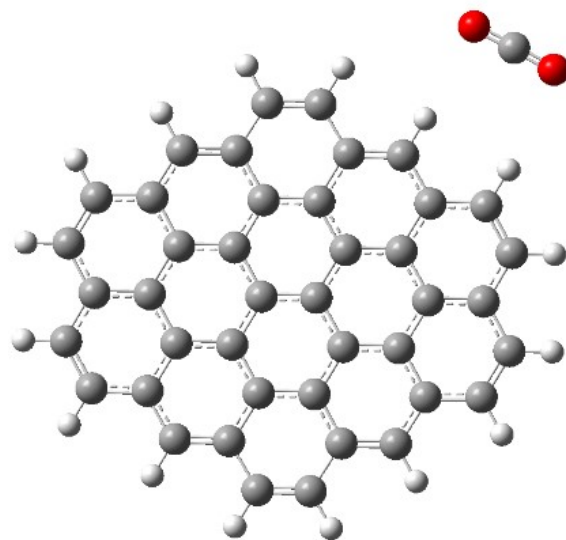

**Figure S4** Adsorption configuration of CO<sub>2</sub> on the undoped carbon model.

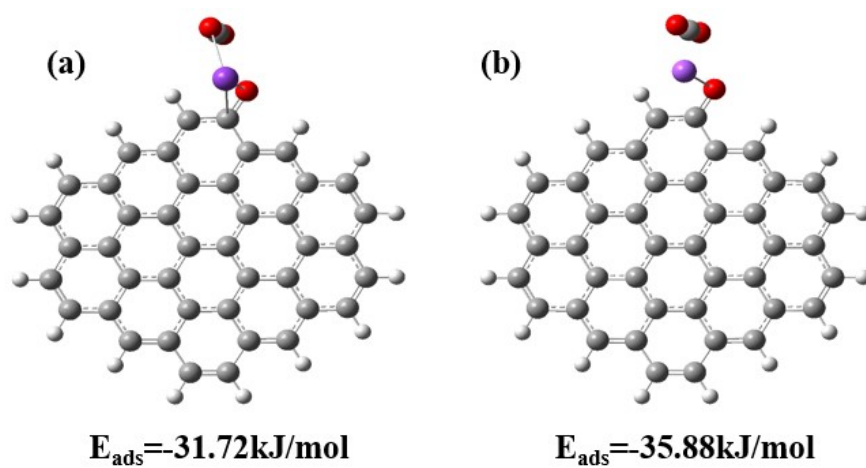

**Figure S5** CO<sub>2</sub> adsorption configuration and adsorption energy on the surface of alkali metal-doped carbon (a)K doping (b)Na doping.

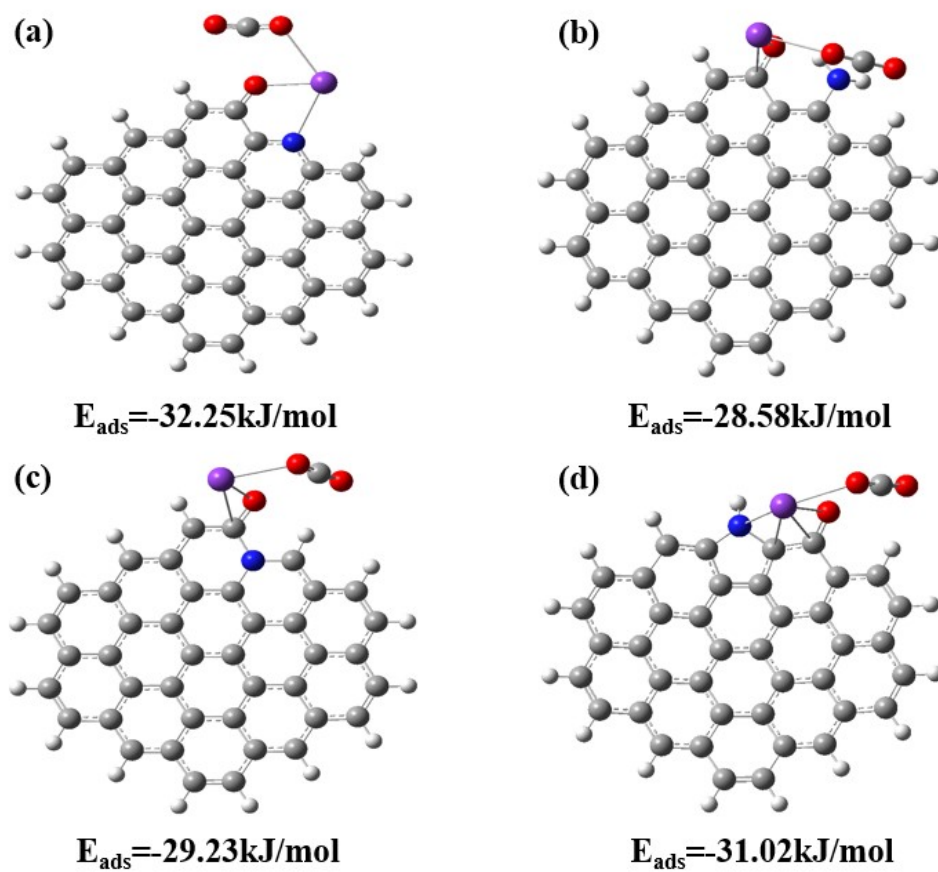

**Figure S6** CO<sub>2</sub> adsorption configuration and adsorption energy of N and K co-doped carbon model (a) pyridine nitrogen; (b) Amino group; (c) Graphite nitrogen; (d) Pyrrole nitrogen.

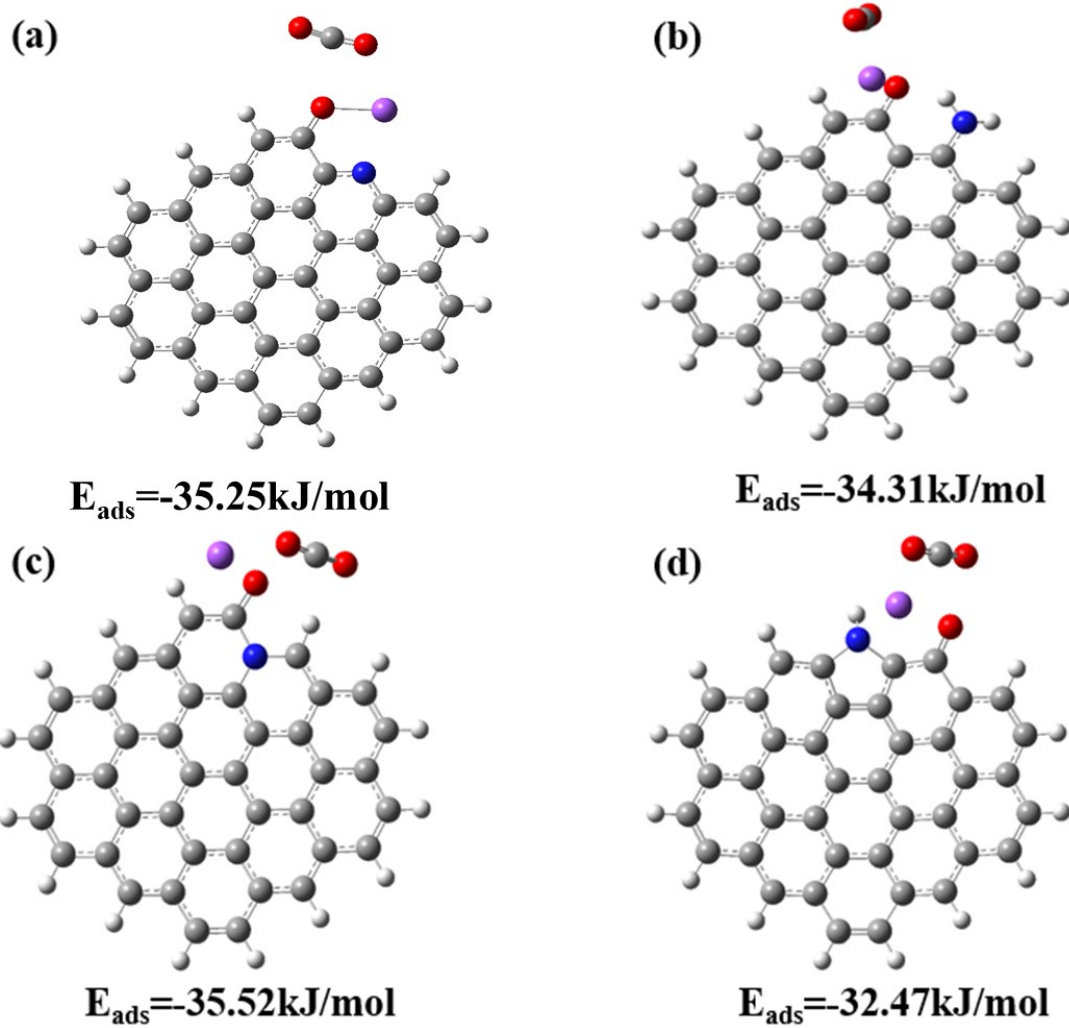

**Figure S7** CO<sub>2</sub> adsorption configuration and adsorption energy of N and Na co-doped carbon model (a) pyridine nitrogen; (b) Amino group; (c) Graphite nitrogen; (d) Pyrrole nitrogen.



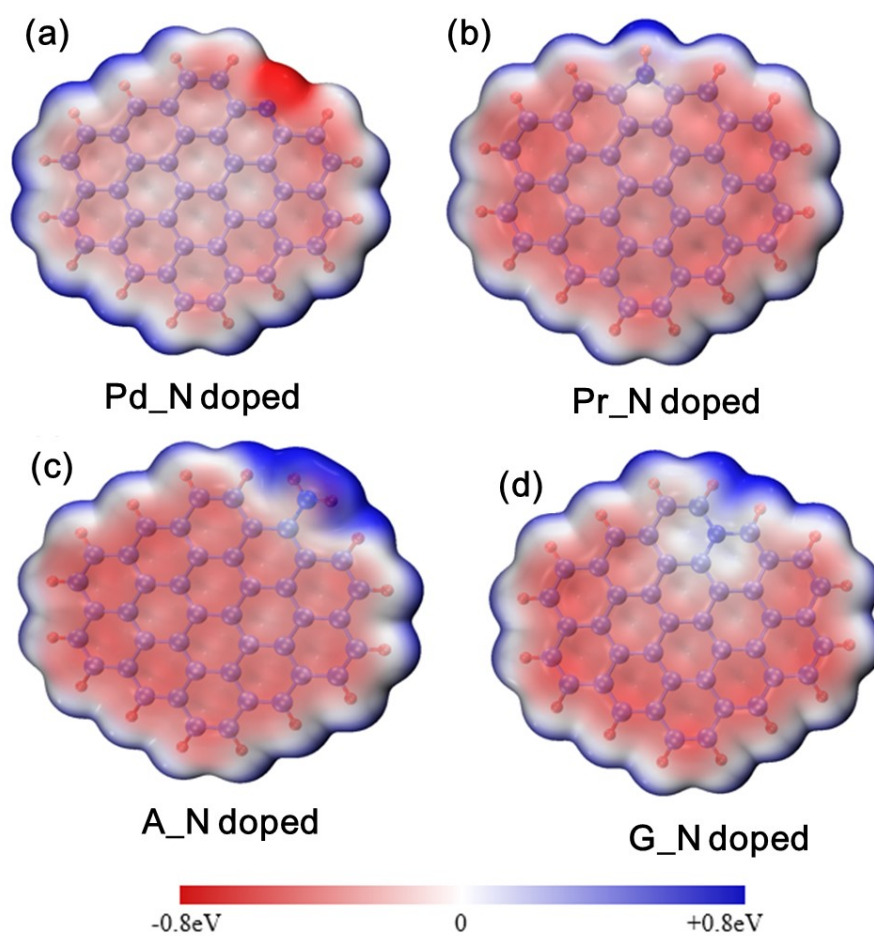

**Figure S8** Electrostatic potential distribution diagram of the nitrogen-doped carbon model. (a) Pyridine nitrogen; (b) Pyrrole nitrogen; (c) amino group; (d) Graphite nitrogen.

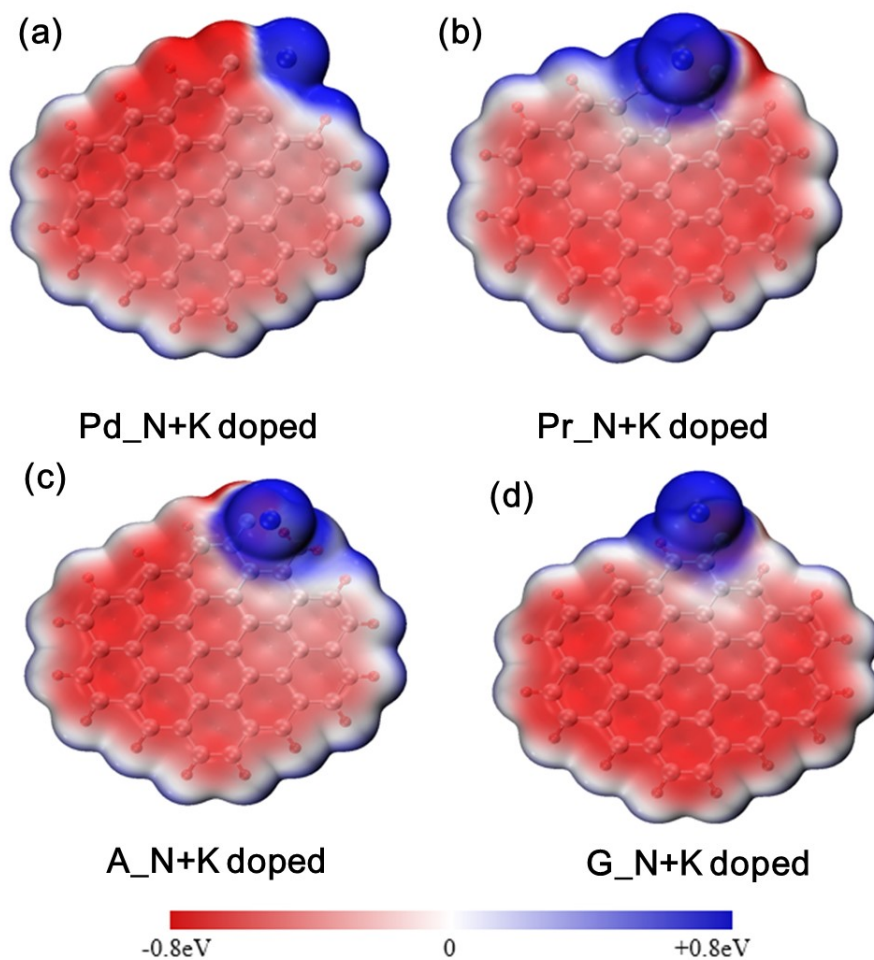

**Figure S9** Electrostatic potential distribution of the nitrogen and potassium co-doped carbon model. (a) Pyridine nitrogen; (b) Pyrrole nitrogen; (c) amino group; (d) Graphite nitrogen.

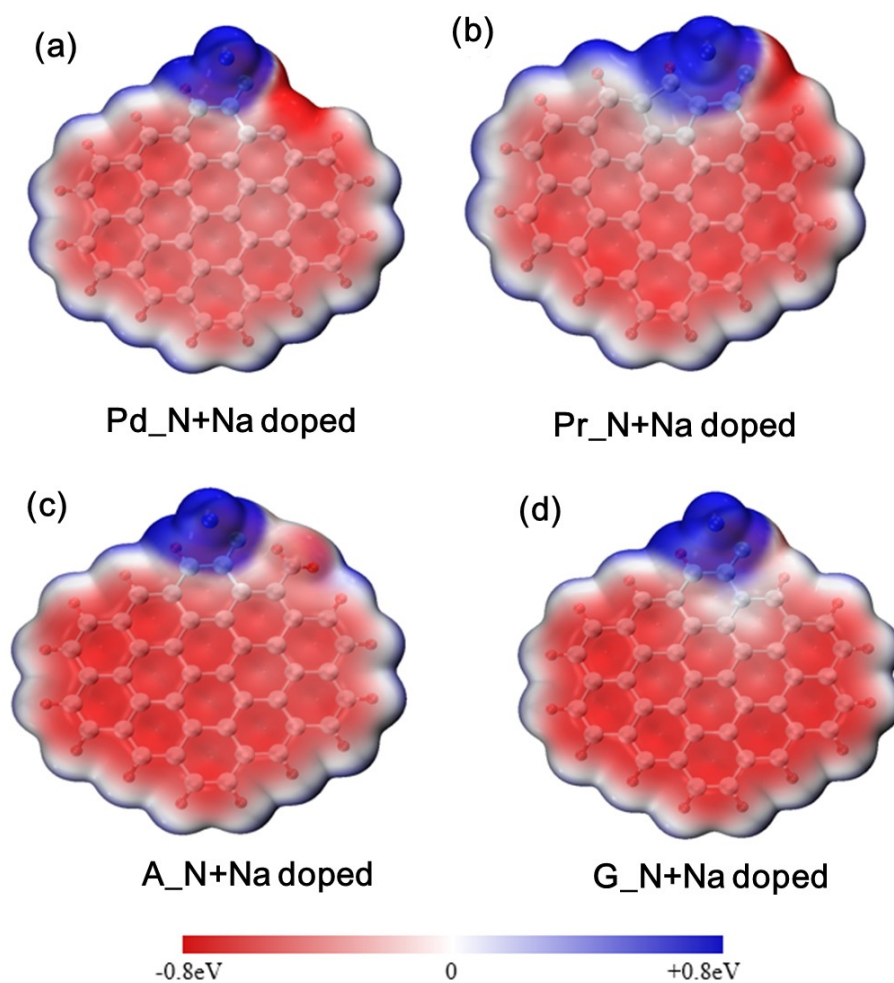

**Figure S10** Electrostatic potential distribution of the carbon model co-doped with nitrogen and Na. (a) Pyridine nitrogen; (b) Pyrrole nitrogen; (c) amino group; (d) Graphite nitrogen.

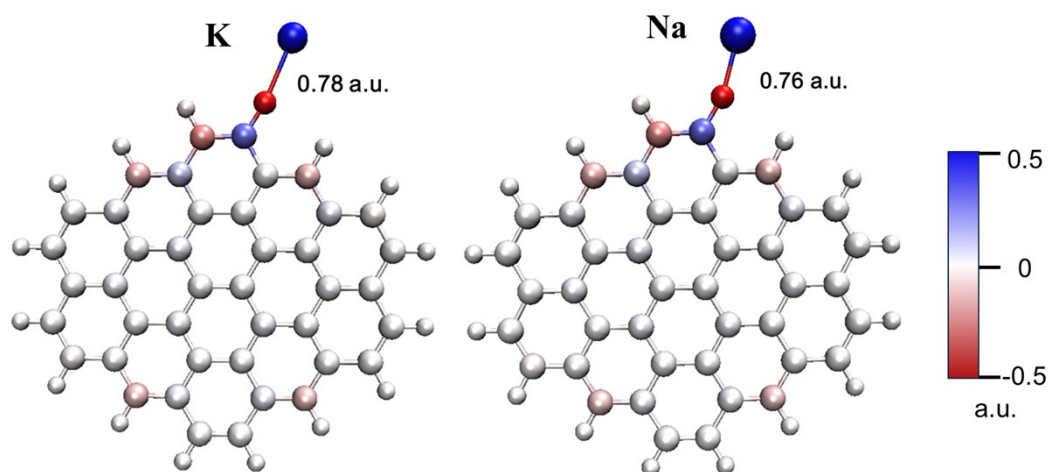

**Figure S11** Mulliken population analysis of alkali metal (K, Na) doped carbon models.

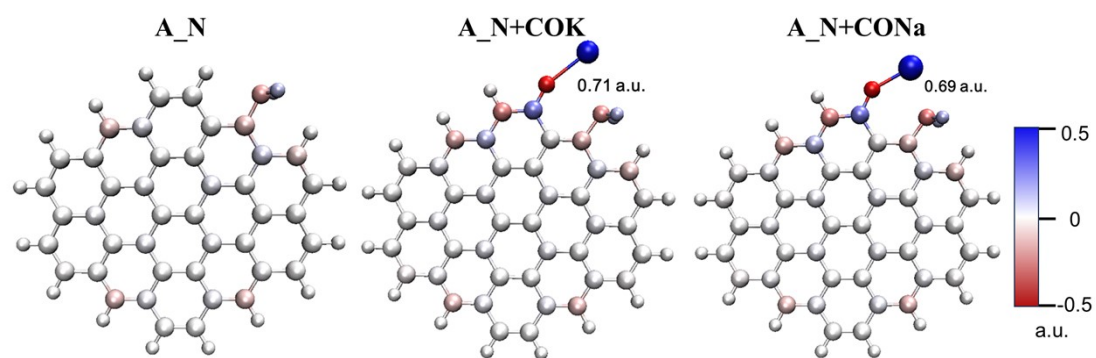

**Figure S12** Mulliken population analysis of carbon models doped with amino, co-doped with amino and potassium, and co-doped with amino and sodium.

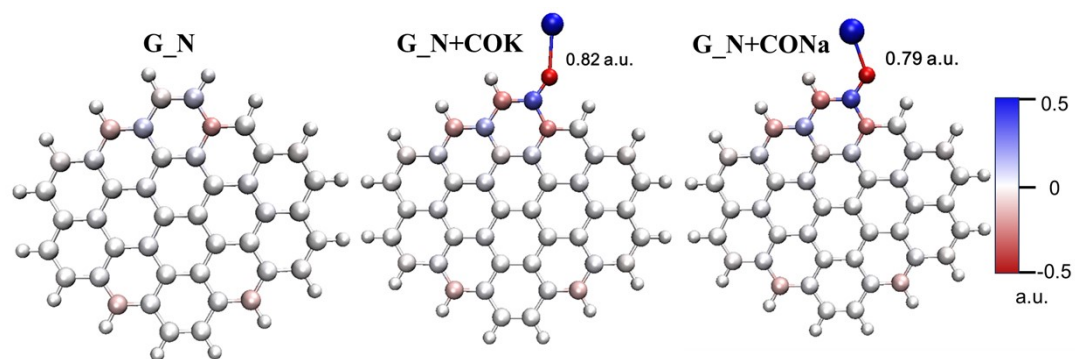

**Figure S13** Mulliken population analysis of carbon models doped with graphite nitrogen, co-doped with graphite nitrogen and potassium, and co-doped with graphite nitrogen and sodium.

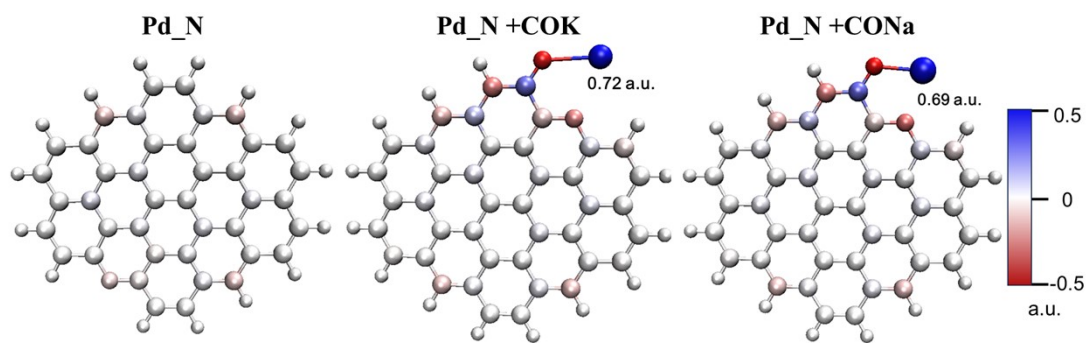

**Figure S14** Mulliken population analysis of carbon models doped with pyridine nitrogen, co-doped with pyridine nitrogen and potassium, and co-doped with pyridine nitrogen and sodium.

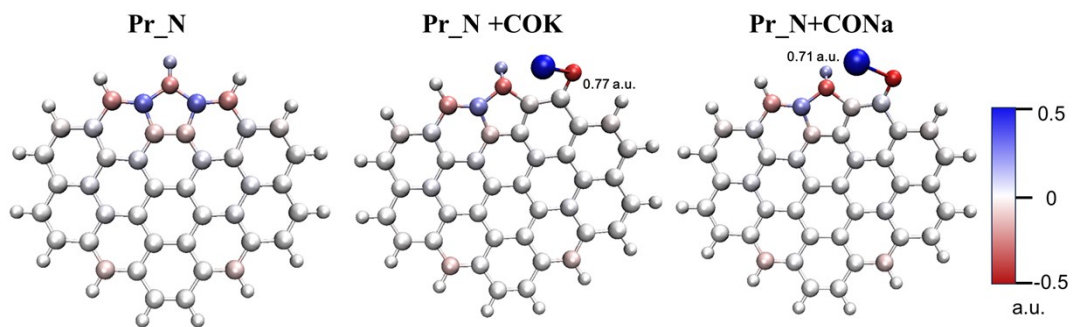

**Figure S15** Mulliken population analysis of carbon models doped with pyrrole nitrogen, co-doped with pyrrole nitrogen and potassium, and co-doped with pyrrole nitrogen and sodium.



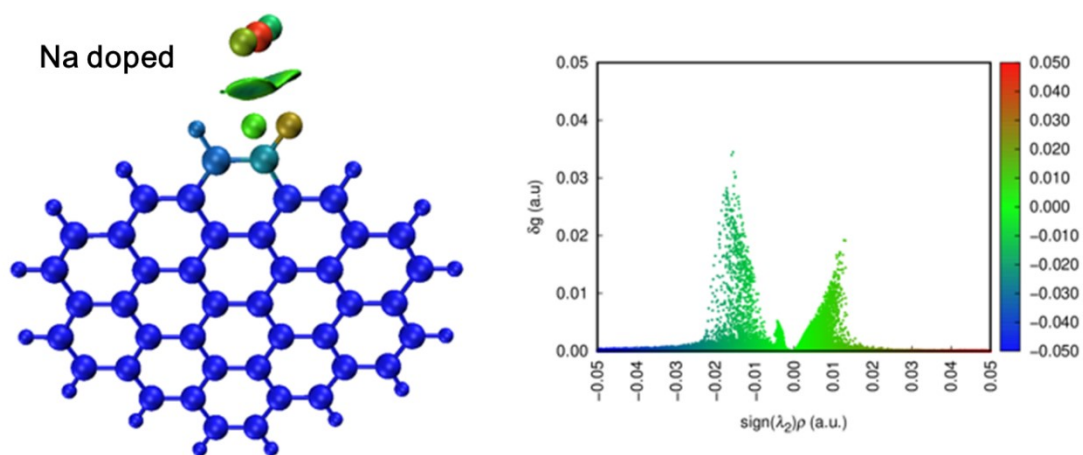

**Figure S16** IGMH analysis diagram of CO<sub>2</sub> adsorption on the surface of the Na-doped carbon model.

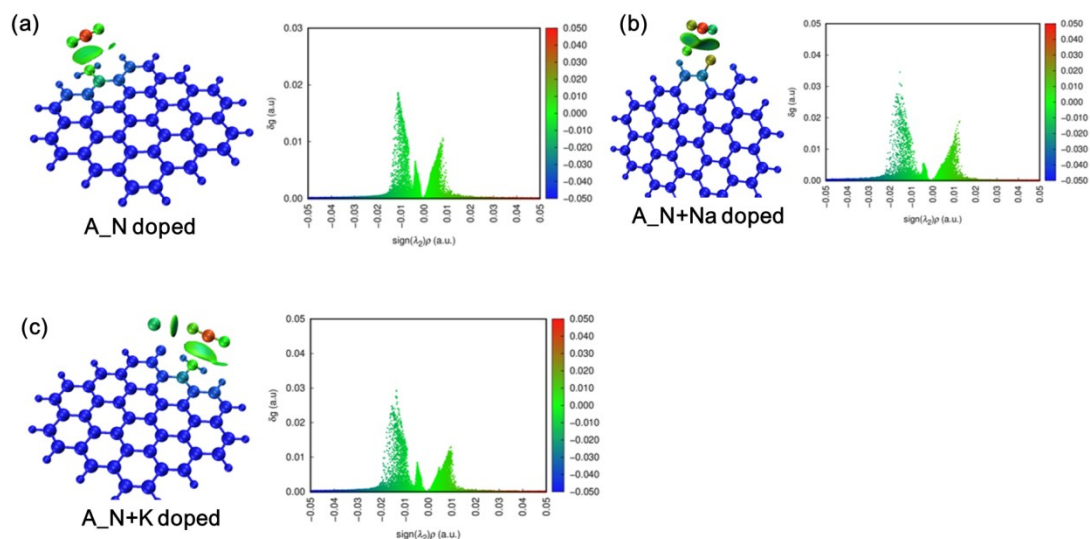

**Figure S17** IGMH analysis diagram of CO<sub>2</sub> adsorption on the surface of the carbon model co-doped with amino and alkali metals. (a) Amino doping; (b) Co-doping of amino and Na; (c) The amino group and K are co-doped.

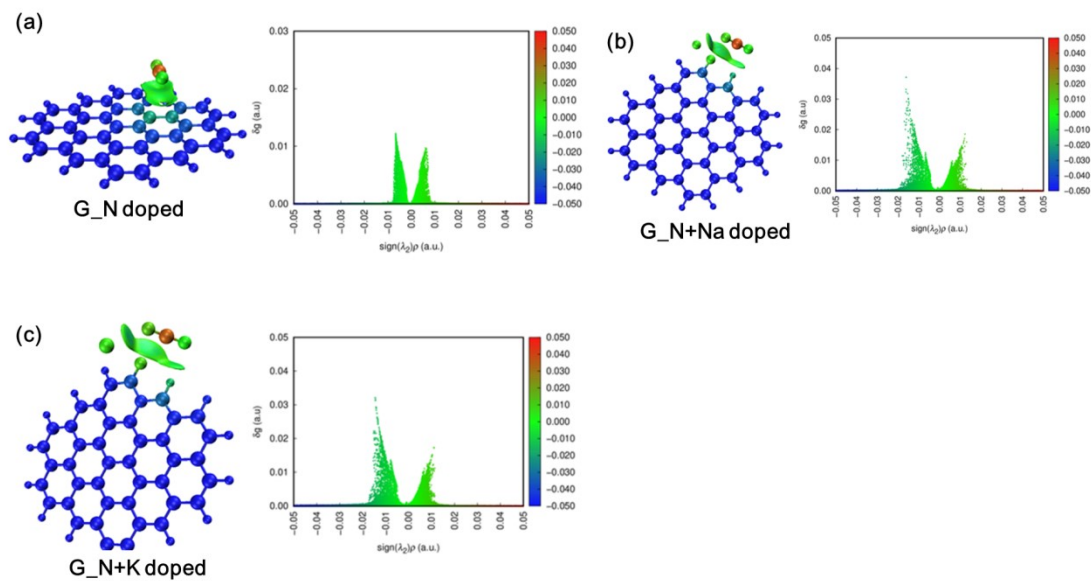

**Figure S18** IGMH analysis diagram of CO<sub>2</sub> adsorption on the surface of the graphite nitrogen and alkali metal co-doped carbon model. (a) Graphite nitrogen doping; (b) Graphite nitrogen and Na co-doped; (c) Graphite nitrogen and K co-doped.

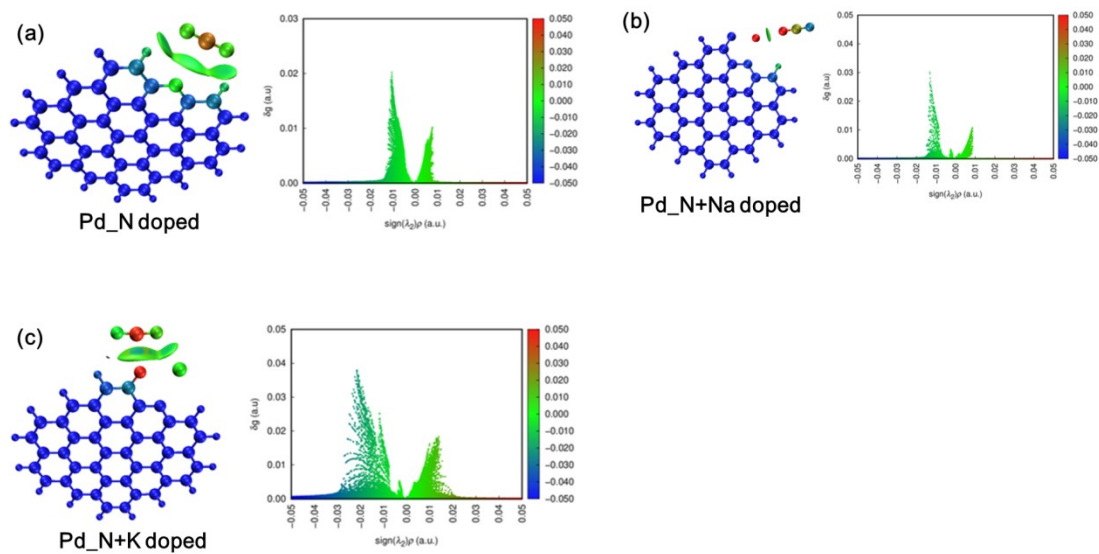

**Figure S19** IGMH analysis diagram of CO<sub>2</sub> adsorption on the surface of the carbon model co-doped with pyridine nitrogen and alkali metals. (a) Pyridine nitrogen doping; (b) Co-doping of pyridine nitrogen and Na; (c) Pyridine nitrogen and K are co-doped.

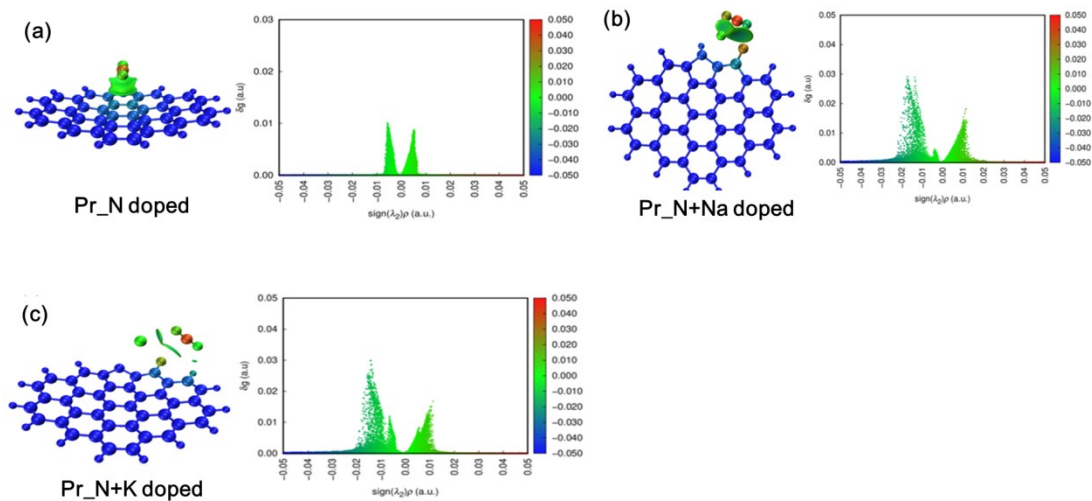

**Figure S20** IGMH analysis diagram of CO<sub>2</sub> adsorption on the surface of the carbon model co-doped with pyrrole nitrogen and alkali metals. (a) pyrrole nitrogen doping; (b) Co-doping of pyrrole nitrogen and Na; (c) Pyrrole nitrogen and K are co-doped.
